# Supplementary material
Source: PubMed Central journal article supplement (PMC5383579)
Supplement: mmc1.pdf [file mmc1.pdf]

**YMTHE, Volume 25**

**Supplemental Information**

**Unravelling Endogenous MicroRNA System**

**Dysfunction as a New Pathophysiological**

**Mechanism in Machado-Joseph Disease**

**Vitor Carmona, Janete Cunha-Santos, Isabel Onofre, Ana Teresa Simões, Udaya Vijayakumar, Beverly L. Davidson, and Luís Pereira de Almeida**

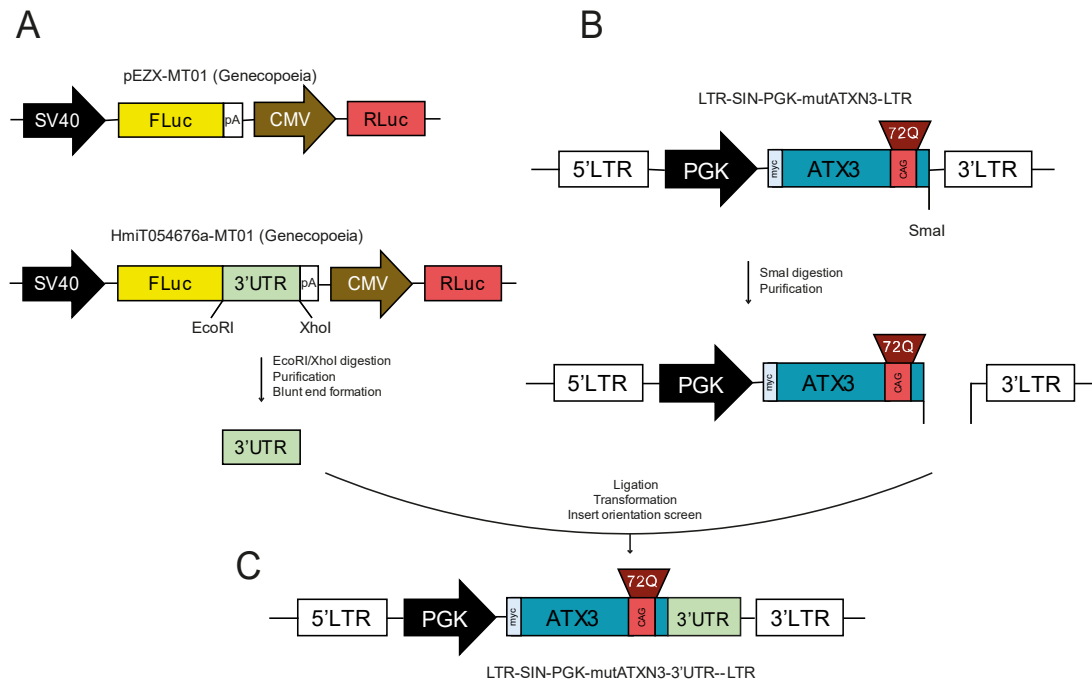

**Figure S1. Schematic representation of the procedure used to clone human ATXN3 3'UTR in a lentiviral vector.** (A) Plasmid constructions encoding for firefly luciferase bound or not to human ATXN3 3'UTR were purchased from Genecopoeia. ATXN3 3'UTR was extracted from HmiT054676a-MT01 after EcoRI and XhoI digestion. The insert was later purified, and turned blunt using Klenow polymerase. (B) A lentiviral vector encoding for mutATXN3 (LTR-SIN-PGK-mutATXN3-LTR) was used as backbone for the introduction of ATXN3 3'UTR after being digested with SmaI. (C) The 3'UTR fragment was ligated downstream of ATXN3 CDS in order to generate LTR-SIN-PGK-mutATXN3-3'UTR-LTR.

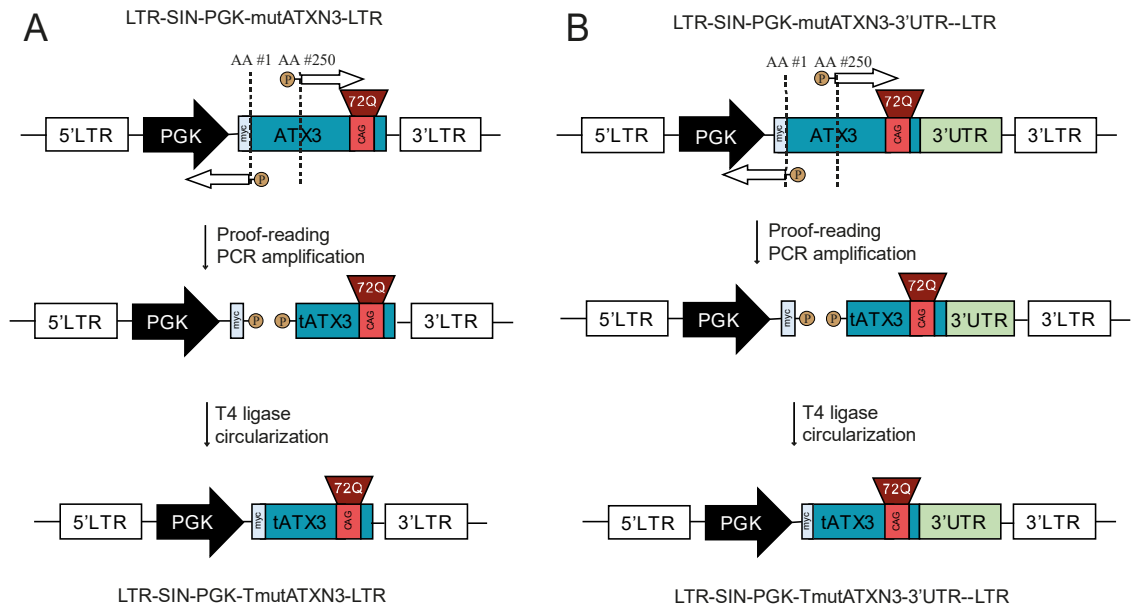

**Figure S2. Schematic representation of the procedure used to generate truncated isoforms of mutATXN3.** (A) LTR-SIN-PGK-mutATXN3-LTR was used as PCR template for inverted PCR mutagenesis. Two phosphorylated oligonucleotides were designed in order to amplify the parental vector full sequence with the exception of the sequence correspondent to the first 250 amino acids of ATXN3. Linear PCR products were circularized with T4 DNA ligase in order to generate LTR-SIN-PGK-TmutATXN3-LTR. (B) LTR-SIN-PGK-mutATXN3-3'UTR-LTR was used as PCR template for inverted PCR mutagenesis. Two phosphorylated oligonucleotides were designed in order to amplify the parental vector full sequence with the exception of the sequence correspondent to the first 250 amino acids of ATXN3. Linear PCR products were circularized with T4 DNA ligase in order to generate LTR-SIN-PGK-TmutATXN3-3'UTR-LTR.

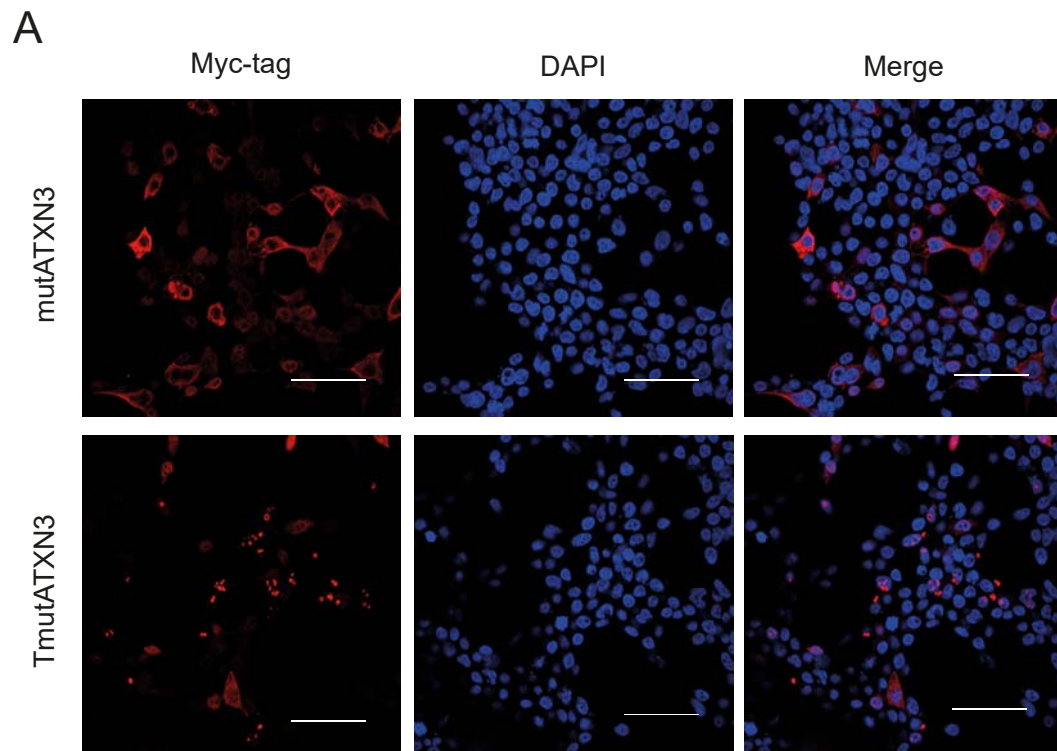

**Figure S3. Generation of constructs encoding for a truncated form of mutATXN3 enhance aggregation *in vitro*.** (A) Truncated versions of mutATXN3 (TmutATXN3) were constructed in order to promote aggregation of mutATXN3 *in vitro*. Upon transfection of HEK293T cells, full-length mutATXN3 remains mostly cytoplasmic with a diffuse staining while TmutATXN3 results in extensive formation of characteristic intranuclear mutATXN3 inclusions. Scale bars: 50 $\mu$ m.

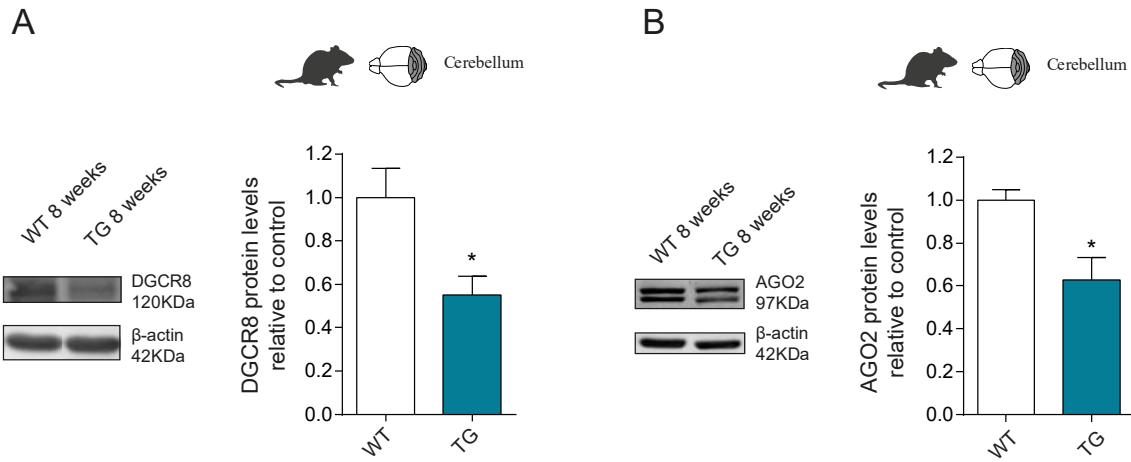

**Figure S4. DGCR8 and AGO2 protein levels are decreased in MJD transgenic mice.** (A) DGCR8 protein levels were found to be significantly downregulated in MJD transgenic mice when compared to littermate control animals (n=5/5). (B) AGO2 protein levels were found to be significantly downregulated in MJD transgenic mice when compared to littermate control animals (n=4/5). All samples were normalized with actin. Statistical significance was evaluated with unpaired Student's t-test (\*P<0.05). Data are expressed as mean  $\pm$  SEM.

A

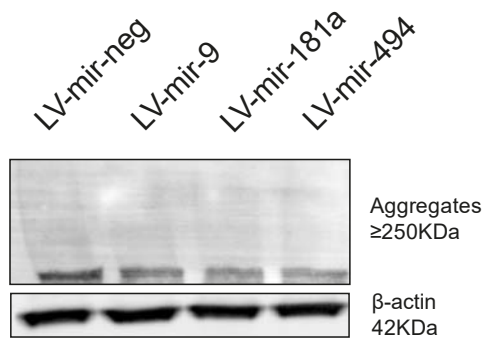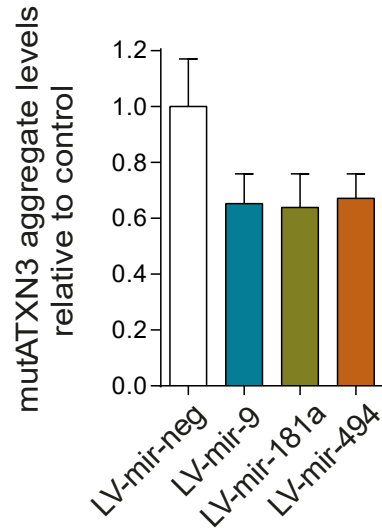

B

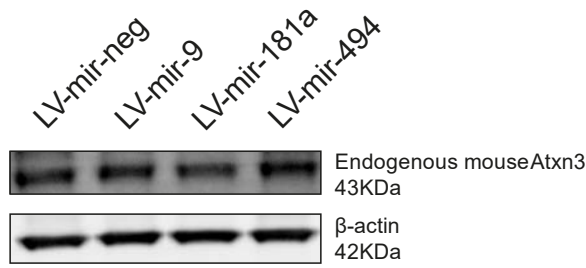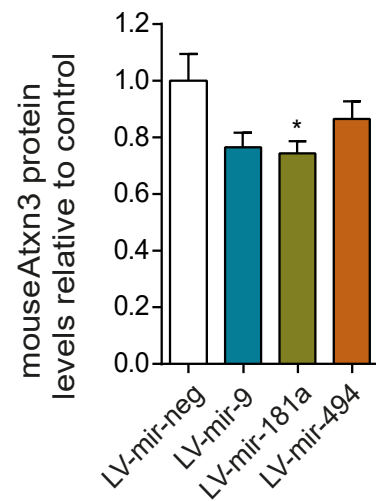

**Figure S5. Western blot analysis of human mutATXN3 and endogenous mouse Atxn3 *in vivo*.** (A) Stereotaxic injection of lentivirus encoding for mutATXN3 together with either mir-9, mir-181a or mir-494 led to a tendency for a reduction in the levels of aggregated mutATXN3 when compared to animals injected with mir-neg (n=4-5). (B) The levels of endogenous mouse Atxn3 were found to be significantly downregulated in mice injected with lentiviral particles encoding for mir-181a. This is in accordance with the existence of a miRNA binding site for mir-181a in the 3'UTR of mouse Atxn3 (n=4-5). All samples were normalized with actin. Statistical significance was evaluated with unpaired Student's t-test (\*P<0.05). Data are expressed as mean  $\pm$  SEM.

**Table S1. Predicted miRNA binding sites for mir-9, mir-181a and mir-494 in human ATXN3 3'UTR.**

| MicroRNA        | Binding site                                                                               | 3'UTR position   |
|-----------------|--------------------------------------------------------------------------------------------|------------------|
| hsa-mir-9-5p    | CDS ... UUAG <b>CCAAAG</b> A G ... Poly(A)<br>3' ... UCUAUU <b>GGUUUCU</b> - 5' miRNA<br>  | <b>190-196</b>   |
| hsa-mir-181a-5p | CDS ... CUUU <b>AUGAAUG</b> UC ... Poly(A)<br>3' ... UCGCA <b>ACUUACA</b> A 5' miRNA<br>   | <b>770-776</b>   |
| hsa-mir-181a-5p | CDS ... CACCA <b>UGAAUG</b> UA ... Poly(A)<br>3' ... UCGCA <b>ACUUACA</b> A 5' miRNA<br>   | <b>929-936</b>   |
| hsa-mir-181a-5p | CDS ... UCAUG <b>GAAUG</b> UAG ... Poly(A)<br>3' ... UCGCA <b>ACUUACA</b> A 5' miRNA<br>   | <b>1033-1039</b> |
| hsa-mir-181a-5p | CDS ... UCUUU <b>UGAAUG</b> UU ... Poly(A)<br>3' ... UCGCA <b>ACUUACA</b> A 5' miRNA<br>   | <b>1381-1387</b> |
| hsa-mir-181a-5p | CDS ... GCGUU <b>UGAAUG</b> UG ... Poly(A)<br>3' ... UCGCA <b>ACUUACA</b> A 5' miRNA<br>   | <b>2393-2399</b> |
| hsa-mir-494-3p  | CDS ... UAAAA <b>AUGUUUC</b> A ... Poly(A)<br>3' ... GCACA <b>UACAAAG</b> U - 5' miRNA<br> | <b>236-242</b>   |
| hsa-mir-494-3p  | CDS ... UCUAA <b>AUGUUUC</b> U ... Poly(A)<br>3' ... GCACA <b>UACAAAG</b> U - 5' miRNA<br> | <b>1696-1703</b> |

**Table S2. List of oligonucleotide sequences used for PCR based cloning of constructs encoding for pre-miRNA and negative control.**

| <b>microRNA</b> | <b>Primer Sequence (BglII/HindIII)</b> |                                      | <b>Amplicon size</b> |
|-----------------|----------------------------------------|--------------------------------------|----------------------|
| hsa-mir-9       | Forward                                | GTGAT AGATCT GAAATGTCGCCCCGAACCAGT   | 399                  |
|                 | Reverse                                | GTGAT AAGCTT TTGTTGTTTTGTCTCGGACTTCA |                      |
| hsa-mir-181a    | Forward                                | TGATCAGATCTACTGCACAGTCTATCCCACAGTT   | 400                  |
|                 | Reverse                                | TGATCAAGCTTAGGAACAGTGAGCAGTAGGAATAA  |                      |
| hsa-mir-494     | Forward                                | GTGAT AGATCT GACACGCAAATAGAAGCCATCTG | 350                  |
|                 | Reverse                                | GTGAT AAGCTT GCCACACCCCCACGAC        |                      |
| mir-neg         | Forward                                | GTGAT AGATCT CTGGAGGCTTGCTGAAGGCT    | 132                  |
|                 | Reverse                                | GTGAT AAGCTT GGCCATTTGTTCCATGTGAG    |                      |



**Table S3. List of oligonucleotide sequences used for oligo based cloning of constructs encoding for shRNAs targeting human Dicer and Drosha.**

| <b>shRNA</b> | <b>Oligonucleotide sequence</b> |                                                                   |
|--------------|---------------------------------|-------------------------------------------------------------------|
| hDicer       | Top                             | GATCCCCGCTCGAAATCTTACGCAAATATTCAAGAGATATTTGCGTAAGATTTTCGAGCTTTTTA |
|              | Bottom                          | AGCTTAAAAAGCTCGAAATCTTACGCAAATATCTCTTGAATATTTGCGTAAGATTTTCGAGCGGG |
| hDrosha      | Top                             | GATCCCCCAGCGTCCATTGTACTATTTTCAAGAGAAATAGTACAAATGGACGCTGGTTTTTA    |
|              | Bottom                          | AGCTTAAAAACCAGCGTCCATTGTACTATTTCTCTTGAAAATAGTACAAATGGACGCTGGGGG   |

**Table S4. List of custom designed oligonucleotides sequences used in quantitative PCR analysis**

| Gene    | Primer Sequence |                            | Amplicon size |
|---------|-----------------|----------------------------|---------------|
| hDICER  | Forward         | TTAACCTTTTGGTGTTTGATGAGTGT | 98            |
|         | Reverse         | GCGAGGACATGATGGACAATT      |               |
| hDROSHA | Forward         | AACCCTGGGACGAAACCAAG       | 118           |
|         | Reverse         | TCAACTGTGCAGGGCGTATC       |               |
| WPRE    | Forward         | CCGTTGTCAGGCAACGTG         | 86            |
|         | Reverse         | AGCTGACAGGTGGTGGCAAT       |               |
| Albumin | Forward         | GCTGTCATCTCTTGTTGGGCTGT    | 139           |
|         | Reverse         | ACTCATGGGAGCTGCTGGTTC      |               |
| hATXN3  | Forward         | ACAGCATAGGGTCCACTTTGG      | 103           |
|         | Reverse         | CAACCGACGCATTGTTCCAC       |               |
| 18S     | Forward         | CTCAACACGGGAAACCTCAC       | 110           |
|         | Reverse         | CGCTCCACCAACTAAGAACG       |               |
| mDGCR8  | Forward         | GCGAAGAATAAAGCTGCCCCG      | 112           |
|         | Reverse         | TGTGGTTAAAATACTCCAGTTCTTC  |               |
| mFMR1   | Forward         | AAAGCGAGCCCACATGTTGAT      | 109           |
|         | Reverse         | CTGCCTTGA ACTCTCCAGTTG     |               |
| mDDX6   | Forward         | GAGTCGAGCTACTCGCCAAG       | 88            |
|         | Reverse         | CGATTTGATGTTCTGCCTC        |               |
| mAGO2   | Forward         | ACGCTCTGTGTCAATACCCG       | 100           |
|         | Reverse         | TCCTTCAGCGCTGTCATGTT       |               |
| mTARBP2 | Forward         | GGACACTCCTGTCGTTGCTG       | 73            |
|         | Reverse         | CATGGGAGGGCTCCTGGTTA       |               |
